# Supplementary material for: Zeolitic imidazolate framework monoliths with high mesoporosity and effective adsorption of toluene from aqueous solution
Source: Royal Society of Chemistry journal article supplement (doi:10.1039/c7nj02024d), 2017-01-01
Supplement: c7nj02024d1.pdf [file c7nj02024d1.pdf]

*Electronic Supporting Information for:*

## **Zeolitic Imidazolate Framework Monoliths with high Mesoporosity and Effective Adsorption of Toluene from Aqueous Solution**

*An Wang, Miao Jin, Na Li, Yan Ma, Ling Chen, Dan Ma, Bao-Xin Chen, Feng Gao, Yun-Qi Tian\* and Yu-Kun Shi\**

*Institute of Chemistry for Functionalized Materials, College of Chemistry and Chemical Engineering, Liaoning Normal University .P.R. China*

### **Contents**

|                                                           |    |
|-----------------------------------------------------------|----|
| S1 Scanning Electron Microscopy (SEM).....                | S1 |
| S2 N <sub>2</sub> adsorption isotherm IPD-mesoMOF-12..... | S2 |
| S3 Toluene adsorption on IPD-mesoMOF-12.....              | S3 |
| S4. The porous property summary of IPD-mesoMOF-12.....    | S4 |
| S5. The XRPD pattern for one recycled IPD-mesoMOF-12      | S5 |

### **S1 Scanning Electron Microscopy (SEM)**

*IPD-mesoMOF-12(Zn):*

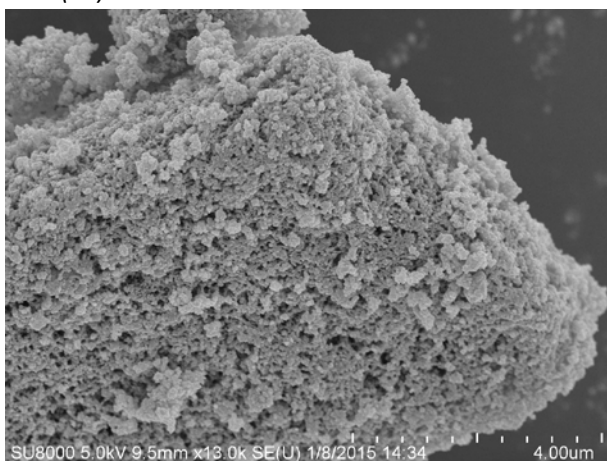

Fig.S1-1 SEM image of IPD-mesoMOF-12a monolith

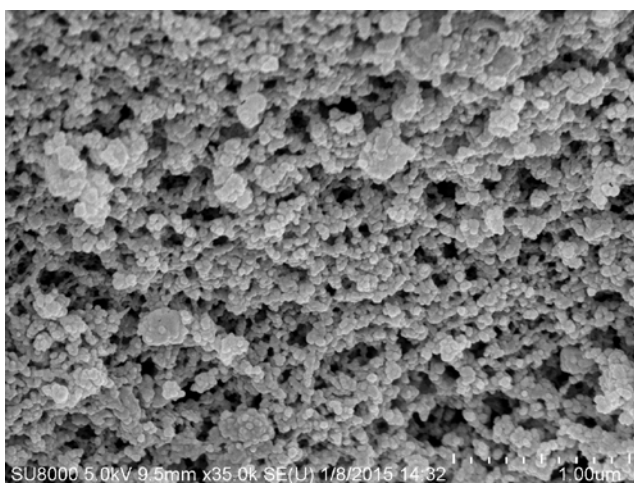

Fig.S1-2 SEM image of IPD-mesoMOF-12a

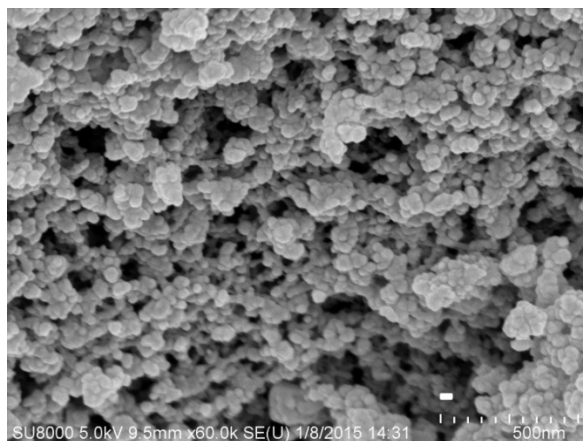

Fig.S1-3 SEM image of IPD-mesoMOF-12a

*IPD-mesoMOF-12(Co)*:

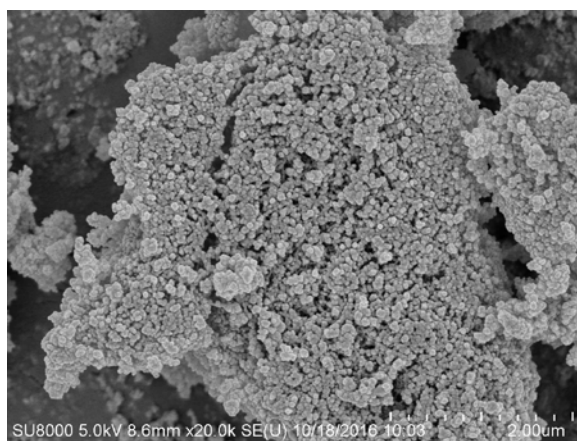

Fig.S1-4 SEM image of IPD-mesoMOF-12(Co)

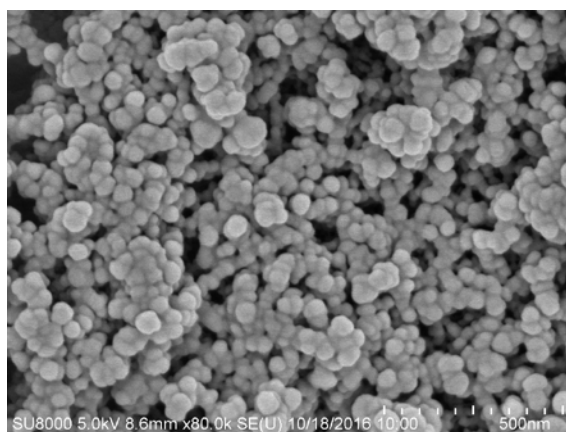

Fig.S1-5 SEM image of IPD-mesoMOF-12(Co)

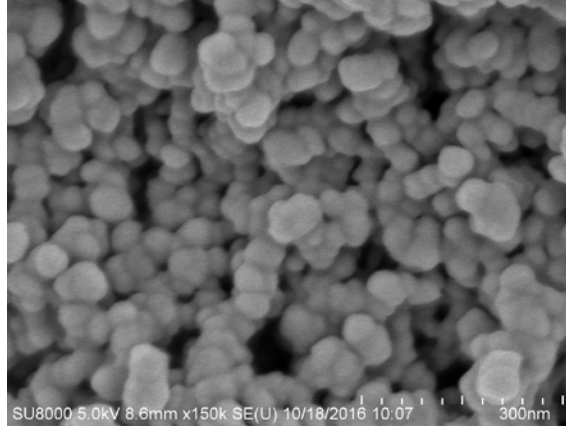

Fig.S1-6 SEM image of IPD-mesoMOF-12(Co)

## S2 N<sub>2</sub> adsorption isotherm on IPD-mesoMOF-12

*IPD-mesoMOF-12(Zn):*

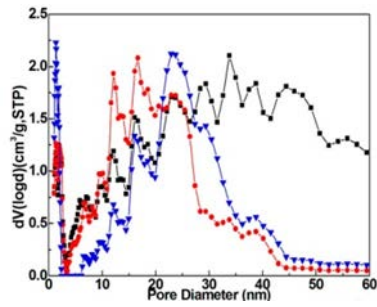

Fig.S2-1 The pore size distribution of IPD-mesoMOF-12a, -12b and -12c monoliths, respectively.

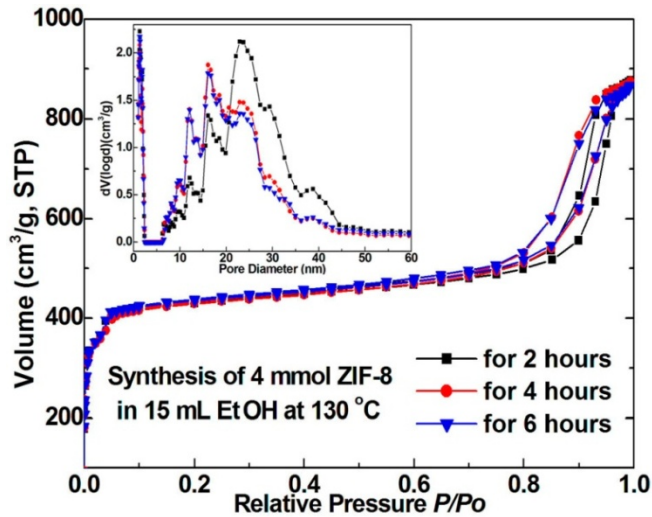

Fig.S2-2 Nitrogen adsorption-desorption isotherm of IPD-mesoMOF-12(Zn) prepared in different solvothermal times

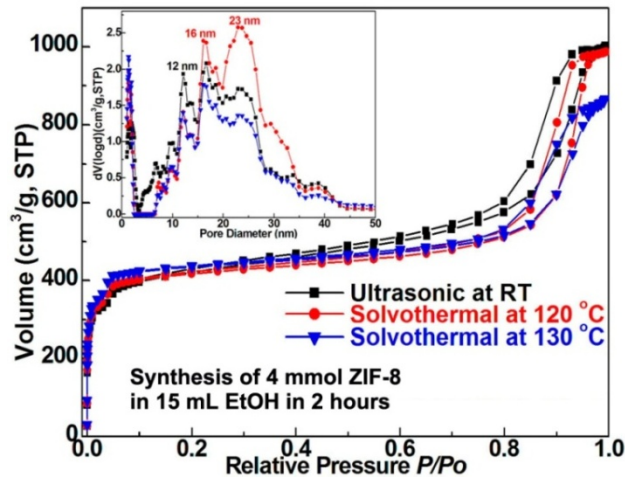

Fig.S2-3 Nitrogen adsorption-desorption isotherm of IPD-mesoMOF-12(Zn)  
Prepared at different temperature

IPD-mesoMOF-12(Co):

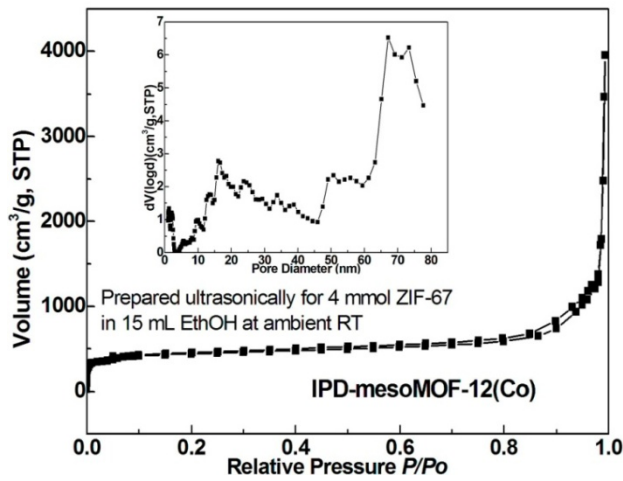

Fig.S2-4 Nitrogen adsorption-desorption isotherm of IPD-mesoMOF-12(Co)

### S3 Toluene adsorption on IPD-mesoMOF-12(Zn)

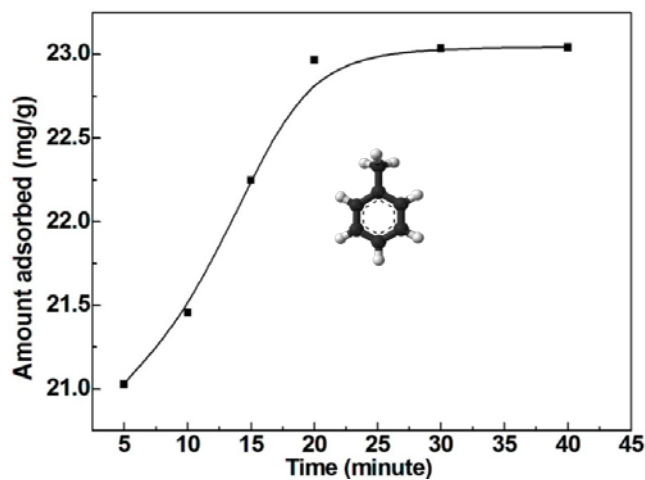

Fig.S3-1 Toluene adsorption kinetics on IPD-mesoMOF-12

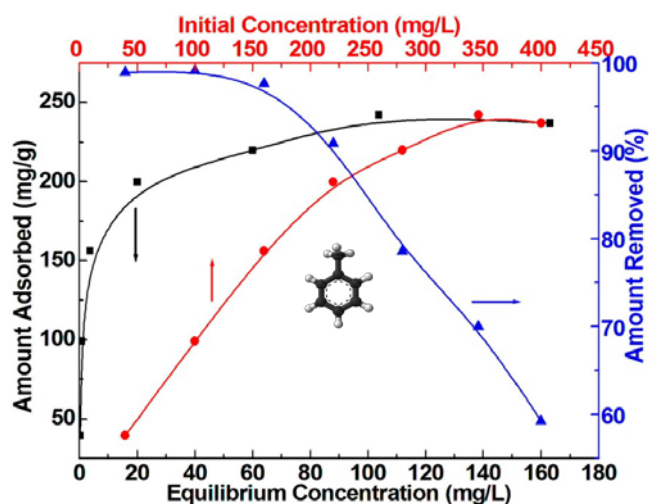

Fig.S3-2 Toluene adsorption on IPD-mesoMOF-12 and removed from water

#### S4. The porous property summary of IPD-mesoMOF-12

Table S-1

| Samples                | Pore Structure characteristic |                    |                   |                     |                    |                     |
|------------------------|-------------------------------|--------------------|-------------------|---------------------|--------------------|---------------------|
|                        | $S_{BET}(m^2/g)$              | $S_{micro}(m^2/g)$ | $S_{meso}(m^2/g)$ | $V_{micro}(cm^3/g)$ | $V_{meso}(cm^3/g)$ | $V_{total}(cm^3/g)$ |
| IPD-mesoMOF-12a(Zn)    | 1706                          | 1136               | 571               | 0.42                | 1.70               | 2.12                |
| IPD-mesoMOF-12b(Zn)    | 1665                          | 1168               | 498               | 0.43                | 1.12               | 1.55                |
| IPD-mesoMOF-12c(Zn)    | 1732                          | 1500               | 232               | 0.56                | 0.80               | 1.36                |
| IPD-mesoMOF-12(Co)(RT) | 1728                          | 1243               | 485               | 0.47                | 5.6 5              | 6.12                |

#### S5. XRPD pattern for one recycled IPD-mesoMOF-12

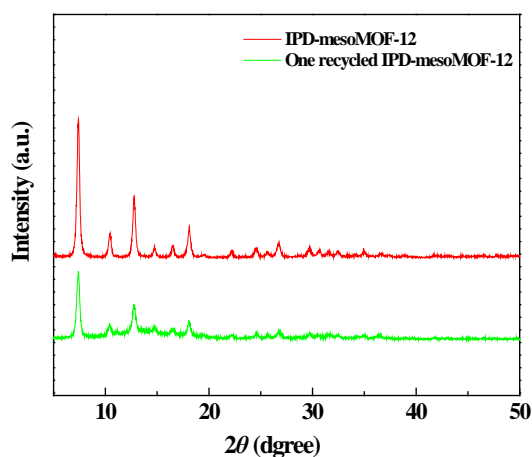

Fig.S5-1 XRPD patterns of IPD-mesoMOF-12 and one recycled IPD-mesoMOF-12.
